# Supplementary material for: Early Life Stress Is Associated with Alterations in Lymphocyte Subsets Independent of Increased Inflammation in Adolescents
Source: MDPI journal article supplement (doi:10.3390/biom14030262), 2024-02-22
Supplement: s1 [file s1]

## Supplementary Materials

**Supplementary Table S1.** Markers used to determine 21 cell subsets using flow cytometry

| CELL TYPE                              | MARKERS                                |
|----------------------------------------|----------------------------------------|
| B lymphocytes                          | CD3- CD19+                             |
| Naive B cells                          | CD3- CD19+ IgD+ CD27-                  |
| IgD- memory B cells                    | CD3- CD19+ IgD- CD27+                  |
| IgD+ memory B cells                    | CD3- CD19+ IgD+ CD27+                  |
| Senescent Bcells                       | CD19+, CD57+                           |
| T cells                                | CD3+ CD19-                             |
| Cytotoxic T cells                      | CD3+ CD19- CD8+ CD4-                   |
| Naïve cytotoxic T cells                | CD3+ CD19- CD8+ CD4- CD45RA+ CCR7+     |
| Effector (E) cytotoxic T cells         | CD3+ CD19- CD8+ CD4- CD45RA+ CCR7-     |
| Central Memory cytotoxic T cells       | CD3+ CD19- CD8+ CD4- CD45RA- CCR7+     |
| Effector Memory (EM) Cytotoxic T cells | CD3+ CD19- CD8+ CD4- CD45RA- CCR7-     |
| Helper T cells                         | CD3+ CD19- CD8-                        |
| Naïve Helper T cells                   | CD3+ CD19- CD8- CD4+ CD45RA+ CCR7+     |
| Central Memory Naïve T cells           | CD3+ CD19- CD8- CD4+ CD45RA- CCR7+     |
| Effector Helper T-cells                | CD3+ CD19- CD8- CD4+ CD45RA+ CCR7-     |
| Effector memory helper T cells         | CD3+ CD19- CD8- CD4+ CD45RA- CCR7-     |
| Senescent Tcells                       | CD3+, CD57+                            |
| Senescent Cytotoxic Tcells             | CD3+, CD57+, CD4-, CD8+                |
| Senescent Helper Tcells                | CD3+, CD57+, CD4+, CD8-                |
| Regulatory T cells                     | CD3+, CD19-, CD4+, CD8-, CD25+, CD127- |
| Natural Killer Tcells                  | CD3+, CD56+                            |

**Supplementary Table S2.** Cell subset characteristics, non-transformed

| Cell types                               | Non-adopted        | Previously-Institutionalized |
|------------------------------------------|--------------------|------------------------------|
| <b>B lymphocytes</b>                     |                    |                              |
| Mean (SD)                                | 12.2 (5.79)        | 12.4 (5.97)                  |
| Median [Min, Max]                        | 11.1 [1.77, 36.6]  | 11.8 [0.180, 32.4]           |
| Missing                                  | 9 (9.4%)           | 4 (4.2%)                     |
| <b>Central Memory Cytotoxic T cells</b>  |                    |                              |
| Mean (SD)                                | 0.954 (0.801)      | 1.04 (0.709)                 |
| Median [Min, Max]                        | 0.750 [0, 4.50]    | 0.825 [0, 3.19]              |
| Missing                                  | 9 (9.4%)           | 4 (4.2%)                     |
| <b>Central Memory Naïve T cells</b>      |                    |                              |
| Mean (SD)                                | 10.6 (4.72)        | 11.6 (3.52)                  |
| Median [Min, Max]                        | 10.7 [0, 23.7]     | 11.3 [3.49, 22.1]            |
| Missing                                  | 9 (9.4%)           | 4 (4.2%)                     |
| <b>Cytotoxic T Cells</b>                 |                    |                              |
| Mean (SD)                                | 26.7 (7.37)        | 29.2 (7.15)                  |
| Median [Min, Max]                        | 25.8 [5.15, 47.8]  | 29.0 [10.4, 43.6]            |
| Missing                                  | 9 (9.4%)           | 4 (4.2%)                     |
| <b>Effector Cytotoxic T cells</b>        |                    |                              |
| Mean (SD)                                | 31.1 (16.2)        | 36.0 (14.3)                  |
| Median [Min, Max]                        | 26.2 [5.93, 73.2]  | 32.6 [7.48, 82.7]            |
| Missing                                  | 9 (9.4%)           | 4 (4.2%)                     |
| <b>Effector Helper T cells</b>           |                    |                              |
| Mean (SD)                                | 6.08 (5.27)        | 5.78 (3.61)                  |
| Median [Min, Max]                        | 4.52 [0.630, 27.2] | 4.99 [0.950, 27.2]           |
| Missing                                  | 9 (9.4%)           | 4 (4.2%)                     |
| <b>Effector Memory Cytotoxic T cells</b> |                    |                              |
| Mean (SD)                                | 8.09 (5.15)        | 11.5 (6.63)                  |
| Median [Min, Max]                        | 7.63 [0, 29.7]     | 9.22 [2.19, 32.1]            |
| Missing                                  | 9 (9.4%)           | 4 (4.2%)                     |
| <b>Effector Memory Helper T cells</b>    |                    |                              |
| Mean (SD)                                | 17.2 (8.85)        | 23.5 (9.46)                  |
| Median [Min, Max]                        | 15.4 [0.560, 42.4] | 21.7 [4.27, 50.8]            |
| Missing                                  | 9 (9.4%)           | 4 (4.2%)                     |
| <b>Helper T Cells</b>                    |                    |                              |
| Mean (SD)                                | 65.2 (8.05)        | 61.9 (7.59)                  |
| Median [Min, Max]                        | 65.5 [42.2, 82.8]  | 62.7 [48.1, 80.3]            |
| Missing                                  | 9 (9.4%)           | 4 (4.2%)                     |
| <b>IgD- memory B cells</b>               |                    |                              |

|                                   |                    |                        |
|-----------------------------------|--------------------|------------------------|
| Mean (SD)                         | 7.75 (7.49)        | 10.4 (5.99)            |
| Median [Min, Max]                 | 5.70 [0, 38.2]     | 10.2 [0.430, 30.4]     |
| Missing                           | 9 (9.4%)           | 4 (4.2%)               |
| <b>IgD+ memory B cells</b>        |                    |                        |
| Mean (SD)                         | 7.25 (5.02)        | 6.29 (4.56)            |
| Median [Min, Max]                 | 5.81 [0, 24.7]     | 4.95 [1.24, 30.1]      |
| Missing                           | 9 (9.4%)           | 4 (4.2%)               |
| <b>Naive cytotoxic T cells</b>    |                    |                        |
| Mean (SD)                         | 59.8 (17.7)        | 51.5 (16.5)            |
| Median [Min, Max]                 | 64.5 [16.1, 90.9]  | 52.1 [11.7, 90.0]      |
| Missing                           | 9 (9.4%)           | 4 (4.2%)               |
| <b>Naive helper T cells</b>       |                    |                        |
| Mean (SD)                         | 65.6 (12.6)        | 58.7 (13.2)            |
| Median [Min, Max]                 | 67.6 [19.5, 92.8]  | 59.6 [12.1, 88.0]      |
| Missing                           | 9 (9.4%)           | 4 (4.2%)               |
| <b>Naive B cells</b>              |                    |                        |
| Mean (SD)                         | 80.1 (11.1)        | 77.0 (9.33)            |
| Median [Min, Max]                 | 82.4 [40.2, 100]   | 77.0 [54.3, 93.3]      |
| Missing                           | 9 (9.4%)           | 4 (4.2%)               |
| <b>Natural Killer Tcells</b>      |                    |                        |
| Mean (SD)                         | 2.17 (1.89)        | 2.80 (2.03)            |
| Median [Min, Max]                 | 1.55 [0, 8.89]     | 2.49 [0.0580, 8.89]    |
| Missing                           | 9 (9.4%)           | 4 (4.2%)               |
| <b>Senescent B cells</b>          |                    |                        |
| Mean (SD)                         | 0.209 (0.150)      | 0.265 (0.159)          |
| Median [Min, Max]                 | 0.170 [0, 0.790]   | 0.230 [0.00312, 0.790] |
| Missing                           | 9 (9.4%)           | 4 (4.2%)               |
| <b>Senescent Cytotoxic Tcells</b> |                    |                        |
| Mean (SD)                         | 54.7 (14.6)        | 60.2 (14.3)            |
| Median [Min, Max]                 | 54.3 [19.5, 100]   | 60.7 [22.9, 88.8]      |
| Missing                           | 9 (9.4%)           | 4 (4.2%)               |
| <b>Senescent Helper Tcells</b>    |                    |                        |
| Mean (SD)                         | 18.1 (8.89)        | 20.4 (10.0)            |
| Median [Min, Max]                 | 16.7 [0, 53.7]     | 18.1 [3.44, 45.6]      |
| Missing                           | 9 (9.4%)           | 4 (4.2%)               |
| <b>Senescent Tcells</b>           |                    |                        |
| Mean (SD)                         | 4.33 (4.52)        | 6.64 (4.14)            |
| Median [Min, Max]                 | 2.65 [0.260, 22.3] | 5.60 [0.0880, 18.6]    |
| Missing                           | 9 (9.4%)           | 4 (4.2%)               |

|                   |                    |                   |
|-------------------|--------------------|-------------------|
| <b>T cells</b>    |                    |                   |
| Mean (SD)         | 70.9 (12.0)        | 68.1 (14.1)       |
| Median [Min, Max] | 73.5 [23.7, 89.9]  | 71.5 [1.99, 85.5] |
| Missing           | 9 (9.4%)           | 4 (4.2%)          |
| <b>Tregs</b>      |                    |                   |
| Mean (SD)         | 6.14 (3.85)        | 7.14 (3.71)       |
| Median [Min, Max] | 5.30 [0.820, 16.4] | 7.04 [1.63, 19.1] |
| Missing           | 9 (9.4%)           | 4 (4.2%)          |

**Supplementary Table S3.** Full model results with covariates in regressions examining the association between ELS and Immune Cell Subsets

| Cell Type           | Parameter                                      | Est     | SE    | t-stat | p-value |
|---------------------|------------------------------------------------|---------|-------|--------|---------|
| B lymphocytes       | (Intercept)                                    | 16.958  | 4.68  | 3.623  | <.001   |
|                     | PI                                             | 0.687   | 0.968 | 0.71   | 0.478   |
|                     | Age                                            | -0.498  | 0.205 | -2.427 | 0.016   |
|                     | Sex                                            | 0.744   | 0.953 | 0.78   | 0.437   |
|                     | Time of Blood draw<br>(Minutes since midnight) | 0.005   | 0.008 | 0.608  | 0.544   |
|                     | IL6.ln                                         | -0.138  | 0.542 | -0.255 | 0.799   |
|                     | CRP.ln                                         | 0.629   | 0.555 | 1.133  | 0.259   |
| IgD- memory B cells | (Intercept)                                    | 1.073   | 0.578 | 1.857  | 0.065   |
|                     | PI                                             | 0.325   | 0.119 | 2.721  | 0.007   |
|                     | Age                                            | 0.045   | 0.025 | 1.761  | 0.08    |
|                     | Sex                                            | 0.007   | 0.118 | 0.057  | 0.955   |
|                     | Time of Blood draw<br>(Minutes since midnight) | 0       | 0.001 | 0.304  | 0.761   |
|                     | IL6.ln                                         | 0.05    | 0.067 | 0.742  | 0.459   |
|                     | CRP.ln                                         | -0.079  | 0.069 | -1.148 | 0.253   |
| IgD+ memory B cells | (Intercept)                                    | 1.365   | 0.412 | 3.316  | 0.001   |
|                     | PI                                             | -0.129  | 0.085 | -1.517 | 0.131   |
|                     | Age                                            | 0.049   | 0.018 | 2.712  | 0.007   |
|                     | Sex                                            | -0.115  | 0.084 | -1.367 | 0.174   |
|                     | Time of Blood draw<br>(Minutes since midnight) | 0       | 0.001 | -0.259 | 0.796   |
|                     | IL6.ln                                         | -0.14   | 0.048 | -2.931 | 0.004   |
|                     | CRP.ln                                         | 0.021   | 0.049 | 0.44   | 0.661   |
| Naive B cells       | (Intercept)                                    | 100.678 | 7.828 | 12.862 | <.001   |
|                     | PI                                             | -1.131  | 1.618 | -0.699 | 0.486   |
|                     | Age                                            | -1.191  | 0.343 | -3.473 | 0.001   |
|                     | Sex                                            | 1.016   | 1.595 | 0.637  | 0.525   |
|                     | Time of Blood draw<br>(Minutes since midnight) | -0.008  | 0.013 | -0.597 | 0.551   |
|                     | IL6.ln                                         | 0.215   | 0.907 | 0.237  | 0.813   |
|                     | CRP.ln                                         | 0.888   | 0.929 | 0.956  | 0.34    |
| Senescent B cells   | (Intercept)                                    | 0.338   | 0.125 | 2.707  | 0.008   |
|                     | PI                                             | 0.08    | 0.026 | 3.088  | 0.002   |
|                     | Age                                            | -0.01   | 0.005 | -1.914 | 0.057   |

|                                |                                                |         |        |        |       |
|--------------------------------|------------------------------------------------|---------|--------|--------|-------|
|                                | Sex                                            | 0.076   | 0.025  | 2.977  | 0.003 |
|                                | Time of Blood draw<br>(Minutes since midnight) | 0       | 0      | 2.066  | 0.04  |
|                                | IL6.ln                                         | 0.016   | 0.014  | 1.09   | 0.277 |
|                                | CRP.ln                                         | -0.012  | 0.015  | -0.799 | 0.426 |
| T cells                        | (Intercept)                                    | 56.64   | 10.502 | 5.393  | 0.236 |
|                                | PI                                             | -3.769  | 2.171  | -1.736 | 0.079 |
|                                | Age                                            | 1.032   | 2.14   | 0.482  | 0.647 |
|                                | Sex                                            | 0.142   | 0.46   | 0.31   | 0.785 |
|                                | Time of Blood draw<br>(Minutes since midnight) | 0.023   | 0.017  | 1.335  | 0.188 |
|                                | IL6.ln                                         | 2.597   | 1.217  | 2.135  | 0.029 |
|                                | CRP.ln                                         | -1.882  | 1.246  | -1.51  | 0.127 |
| Helper T cells                 | (Intercept)                                    | 65.187  | 6.216  | 10.488 | <.001 |
|                                | PI                                             | -3.721  | 1.285  | -2.896 | 0.004 |
|                                | Age                                            | 0.247   | 0.272  | 0.907  | 0.366 |
|                                | Sex                                            | -2.594  | 1.266  | -2.048 | 0.042 |
|                                | Time of Blood draw<br>(Minutes since midnight) | -0.005  | 0.01   | -0.468 | 0.64  |
|                                | IL6.ln                                         | -1.027  | 0.72   | -1.427 | 0.156 |
|                                | CRP.ln                                         | 0.138   | 0.737  | 0.187  | 0.852 |
| Central memory naive T cells   | (Intercept)                                    | 2.064   | 3.188  | 0.647  | 0.518 |
|                                | PI                                             | 0.332   | 0.659  | 0.503  | 0.615 |
|                                | Age                                            | 0.451   | 0.14   | 3.231  | 0.001 |
|                                | Sex                                            | 1.013   | 0.649  | 1.56   | 0.121 |
|                                | Time of Blood draw<br>(Minutes since midnight) | 0.003   | 0.005  | 0.512  | 0.609 |
|                                | IL6.ln                                         | 0.638   | 0.369  | 1.726  | 0.086 |
|                                | CRP.ln                                         | -0.316  | 0.378  | -0.836 | 0.404 |
| Effector memory helper T cells | (Intercept)                                    | -10.757 | 6.264  | -1.717 | 0.088 |
|                                | PI                                             | 4.408   | 1.295  | 3.404  | 0.001 |
|                                | Age                                            | 1.567   | 0.274  | 5.712  | <.001 |
|                                | Sex                                            | 0.478   | 1.276  | 0.375  | 0.708 |
|                                | Time of Blood draw (Minutes since midnight)    | 0.008   | 0.01   | 0.823  | 0.411 |
|                                | IL6.ln                                         | 1.61    | 0.726  | 2.219  | 0.028 |
|                                | CRP.ln                                         | -0.143  | 0.743  | -0.192 | 0.848 |
| Effector helper T-cells        | (Intercept)                                    | 0.9     | 0.395  | 2.28   | 0.024 |
|                                | PI                                             | 0.015   | 0.082  | 0.189  | 0.85  |
|                                | Age                                            | 0.014   | 0.017  | 0.818  | 0.415 |
|                                | Sex                                            | 0.009   | 0.08   | 0.114  | 0.91  |
|                                | Time of Blood draw<br>(Minutes since midnight) | 0.001   | 0.001  | 2.072  | 0.04  |
|                                | IL6.ln                                         | -0.077  | 0.046  | -1.68  | 0.095 |
|                                | CRP.ln                                         | 0.077   | 0.047  | 1.641  | 0.103 |
| Naive helper T cells           | (Intercept)                                    | 101.77  | 9.227  | 11.03  | <.001 |
|                                | PI                                             | -4.502  | 1.908  | -2.36  | 0.019 |
|                                | Age                                            | -1.894  | 0.404  | -4.685 | 0     |
|                                | Sex                                            | -2.7    | 1.88   | -1.437 | 0.153 |
|                                | Time of Blood draw<br>(Minutes since midnight) | -0.013  | 0.015  | -0.898 | 0.371 |
|                                | IL6.ln                                         | -0.486  | 1.069  | -0.454 | 0.65  |
|                                | CRP.ln                                         | -1.316  | 1.095  | -1.202 | 0.231 |

|                                   |                                                |        |        |        |       |
|-----------------------------------|------------------------------------------------|--------|--------|--------|-------|
| Cytotoxic T cells                 | (Intercept)                                    | 23.799 | 5.764  | 4.129  | <.001 |
|                                   | PI                                             | 2.606  | 1.192  | 2.187  | 0.03  |
|                                   | Age                                            | -0.051 | 0.253  | -0.201 | 0.841 |
|                                   | Sex                                            | 1.803  | 1.174  | 1.536  | 0.127 |
|                                   | Time of Blood draw<br>(Minutes since midnight) | 0.005  | 0.009  | 0.561  | 0.576 |
|                                   | IL6.ln                                         | 1.232  | 0.668  | 1.845  | 0.067 |
|                                   | CRP.ln                                         | -0.504 | 0.684  | -0.738 | 0.462 |
| Central memory cytotoxic T cells  | (Intercept)                                    | 0.171  | 0.261  | 0.656  | 0.513 |
|                                   | PI                                             | 0.003  | 0.054  | 0.061  | 0.951 |
|                                   | Age                                            | 0.02   | 0.011  | 1.787  | 0.076 |
|                                   | Sex                                            | 0.058  | 0.053  | 1.094  | 0.276 |
|                                   | Time of Blood draw<br>(Minutes since midnight) | 0      | 0      | 0.492  | 0.623 |
|                                   | IL6.ln                                         | 0.015  | 0.03   | 0.5    | 0.618 |
|                                   | CRP.ln                                         | 0.027  | 0.031  | 0.878  | 0.381 |
| Effector cytotoxic T cells        | (Intercept)                                    | 4.396  | 11.574 | 0.38   | 0.705 |
|                                   | PI                                             | 3.946  | 2.393  | 1.649  | 0.101 |
|                                   | Age                                            | 0.455  | 0.507  | 0.898  | 0.37  |
|                                   | Sex                                            | 2.616  | 2.358  | 1.109  | 0.269 |
|                                   | Time of Blood draw<br>(Minutes since midnight) | 0.038  | 0.019  | 2.041  | 0.043 |
|                                   | IL6.ln                                         | -1.089 | 1.341  | -0.812 | 0.418 |
|                                   | CRP.ln                                         | 2.113  | 1.373  | 1.539  | 0.126 |
| Effector memory cytotoxic T cells | (Intercept)                                    | 2.389  | 4.629  | 0.516  | 0.607 |
|                                   | PI                                             | 3.031  | 0.957  | 3.167  | 0.002 |
|                                   | Age                                            | 0.402  | 0.203  | 1.983  | 0.049 |
|                                   | Sex                                            | -0.299 | 0.943  | -0.317 | 0.751 |
|                                   | Time of Blood draw<br>(Minutes since midnight) | -0.001 | 0.007  | -0.07  | 0.944 |
|                                   | IL6.ln                                         | -0.25  | 0.536  | -0.466 | 0.642 |
|                                   | CRP.ln                                         | -0.041 | 0.549  | -0.074 | 0.941 |
| Naive cytotoxic T cells           | (Intercept)                                    | 93.254 | 12.948 | 7.202  | <.001 |
|                                   | PI                                             | -6.881 | 2.677  | -2.57  | 0.011 |
|                                   | Age                                            | -0.899 | 0.567  | -1.586 | 0.115 |
|                                   | Sex                                            | -2.348 | 2.638  | -0.89  | 0.375 |
|                                   | Time of Blood draw<br>(Minutes since midnight) | -0.038 | 0.021  | -1.839 | 0.068 |
|                                   | IL6.ln                                         | 1.389  | 1.5    | 0.926  | 0.356 |
|                                   | CRP.ln                                         | -2.212 | 1.536  | -1.44  | 0.152 |
| Regulatory T cells                | (Intercept)                                    | 6.852  | 2.981  | 2.299  | 0.023 |
|                                   | PI                                             | 0.937  | 0.616  | 1.521  | 0.13  |
|                                   | Age                                            | 0.141  | 0.131  | 1.079  | 0.282 |
|                                   | Sex                                            | 0.499  | 0.607  | 0.823  | 0.412 |
|                                   | Time of Blood draw<br>(Minutes since midnight) | -0.006 | 0.005  | -1.206 | 0.229 |
|                                   | IL6.ln                                         | -0.04  | 0.345  | -0.115 | 0.909 |
|                                   | CRP.ln                                         | -0.309 | 0.354  | -0.874 | 0.384 |
| Senescent T cells                 | (Intercept)                                    | 0.109  | 0.449  | 0.243  | 0.808 |
|                                   | PI                                             | 0.458  | 0.093  | 4.941  | <.001 |
|                                   | Age                                            | 0.006  | 0.02   | 0.324  | 0.746 |
|                                   | Sex                                            | 0.226  | 0.091  | 2.467  | 0.015 |

|                             |                                                |        |        |        |       |
|-----------------------------|------------------------------------------------|--------|--------|--------|-------|
| Senescent cytotoxic T cells | Time of Blood draw<br>(Minutes since midnight) | 0.002  | 0.001  | 3.027  | 0.003 |
|                             | IL6.ln                                         | 0.066  | 0.052  | 1.262  | 0.209 |
|                             | CRP.ln                                         | -0.048 | 0.053  | -0.909 | 0.365 |
|                             | (Intercept)                                    | 37.232 | 11.067 | 3.364  | 0.001 |
|                             | PI                                             | 3.605  | 2.288  | 1.576  | 0.117 |
|                             | Age                                            | 0.839  | 0.485  | 1.73   | 0.086 |
|                             | Sex                                            | 4.614  | 2.254  | 2.047  | 0.042 |
|                             | Time of Blood draw<br>(Minutes since midnight) | 0.006  | 0.018  | 0.363  | 0.717 |
|                             | IL6.ln                                         | 2.43   | 1.282  | 1.896  | 0.06  |
| Senescent helper T cells    | CRP.ln                                         | -0.191 | 1.313  | -0.145 | 0.885 |
|                             | (Intercept)                                    | 22.687 | 7.346  | 3.088  | 0.002 |
|                             | PI                                             | 3.199  | 1.519  | 2.106  | 0.037 |
|                             | Age                                            | -0.124 | 0.322  | -0.385 | 0.701 |
|                             | Sex                                            | -4.146 | 1.497  | -2.77  | 0.006 |
|                             | Time of Blood draw<br>(Minutes since midnight) | -0.003 | 0.012  | -0.233 | 0.816 |
|                             | IL6.ln                                         | -0.426 | 0.851  | -0.501 | 0.617 |
|                             | CRP.ln                                         | -0.115 | 0.871  | -0.132 | 0.895 |
|                             | (Intercept)                                    | -0.179 | 0.424  | -0.421 | 0.674 |
| Natural killer T cells      | PI                                             | 0.131  | 0.088  | 1.499  | 0.136 |
|                             | Age                                            | 0.028  | 0.019  | 1.521  | 0.13  |
|                             | Sex                                            | 0.12   | 0.086  | 1.388  | 0.167 |
|                             | Time of Blood draw<br>(Minutes since midnight) | 0.001  | 0.001  | 2.048  | 0.042 |
|                             | IL6.ln                                         | 0.155  | 0.049  | 3.148  | 0.002 |
|                             | CRP.ln                                         | -0.046 | 0.05   | -0.91  | 0.364 |
|                             | (Intercept)                                    | -0.179 | 0.424  | -0.421 | 0.674 |
|                             | PI                                             | 0.131  | 0.088  | 1.499  | 0.136 |
|                             | Age                                            | 0.028  | 0.019  | 1.521  | 0.13  |

**Supplementary Table S4.** Association between ELS and Immune Cell Subsets in CMV Negative Youth

| Cell Subset                              | Est    | SE    | t-stat | p-value | Cohen's f2 |
|------------------------------------------|--------|-------|--------|---------|------------|
| <b>B lymphocytes</b>                     | 0.611  | 2.078 | 0.294  | 0.77    | 0.002      |
| <b>IgD- memory B cells</b>               | 0.103  | 0.242 | 0.426  | 0.672   | 0.005      |
| <b>IgD+ memory B cells</b>               | -0.363 | 0.17  | -2.137 | 0.037   | 0.063      |
| <b>Naive B cells</b>                     | 4.08   | 3.155 | 1.293  | 0.201   | 0.019      |
| <b>Senescent B cells</b>                 | 0.069  | 0.044 | 1.566  | 0.123   | 0.028      |
| <b>T cells</b>                           | -0.35  | 4.339 | -0.081 | 0.893   | 0.001      |
| <b>Helper T cells</b>                    | -7.051 | 2.603 | -2.709 | 0.009*  | 0.147      |
| <b>Central memory naive T cells</b>      | 0.465  | 1.375 | 0.338  | 0.736   | 0.002      |
| <b>Effector memory helper T cells</b>    | 2.793  | 2.286 | 1.222  | 0.227   | 0.059      |
| <b>Effector helper T-cells</b>           | -0.157 | 0.151 | -1.042 | 0.302   | 0.001      |
| <b>Naive helper T cells</b>              | -1.355 | 2.967 | -0.457 | 0.649   | 0.03       |
| <b>Cytotoxic T cells</b>                 | 5.181  | 2.248 | 2.304  | 0.025*  | 0.099      |
| <b>Central memory cytotoxic T cells</b>  | 0.007  | 0.124 | 0.053  | 0.958   | 0.002      |
| <b>Effector cytotoxic T cells</b>        | 0.095  | 3.899 | 0.024  | 0.981   | 0.008      |
| <b>Effector memory cytotoxic T cells</b> | 0.969  | 1.572 | 0.617  | 0.54    | 0.008      |
| <b>Naive cytotoxic T cells</b>           | -0.867 | 4.505 | -0.192 | 0.848   | 0.012      |

|                                    |        |       |        |        |       |
|------------------------------------|--------|-------|--------|--------|-------|
| <b>Regulatory T cells</b>          | 1.3    | 1.319 | 0.986  | 0.328  | 0.014 |
| <b>Senescent T cells</b>           | 0.194  | 0.123 | 1.578  | 0.12   | 0.073 |
| <b>Senescent cytotoxic T cells</b> | -4.548 | 4.198 | -1.083 | 0.283  | 0.004 |
| <b>Senescent helper T cells</b>    | 0.373  | 2.353 | 0.159  | 0.875  | 0.001 |
| <b>Natural killer T cells</b>      | 0.325  | 0.157 | 2.071  | 0.043* | 0.12  |



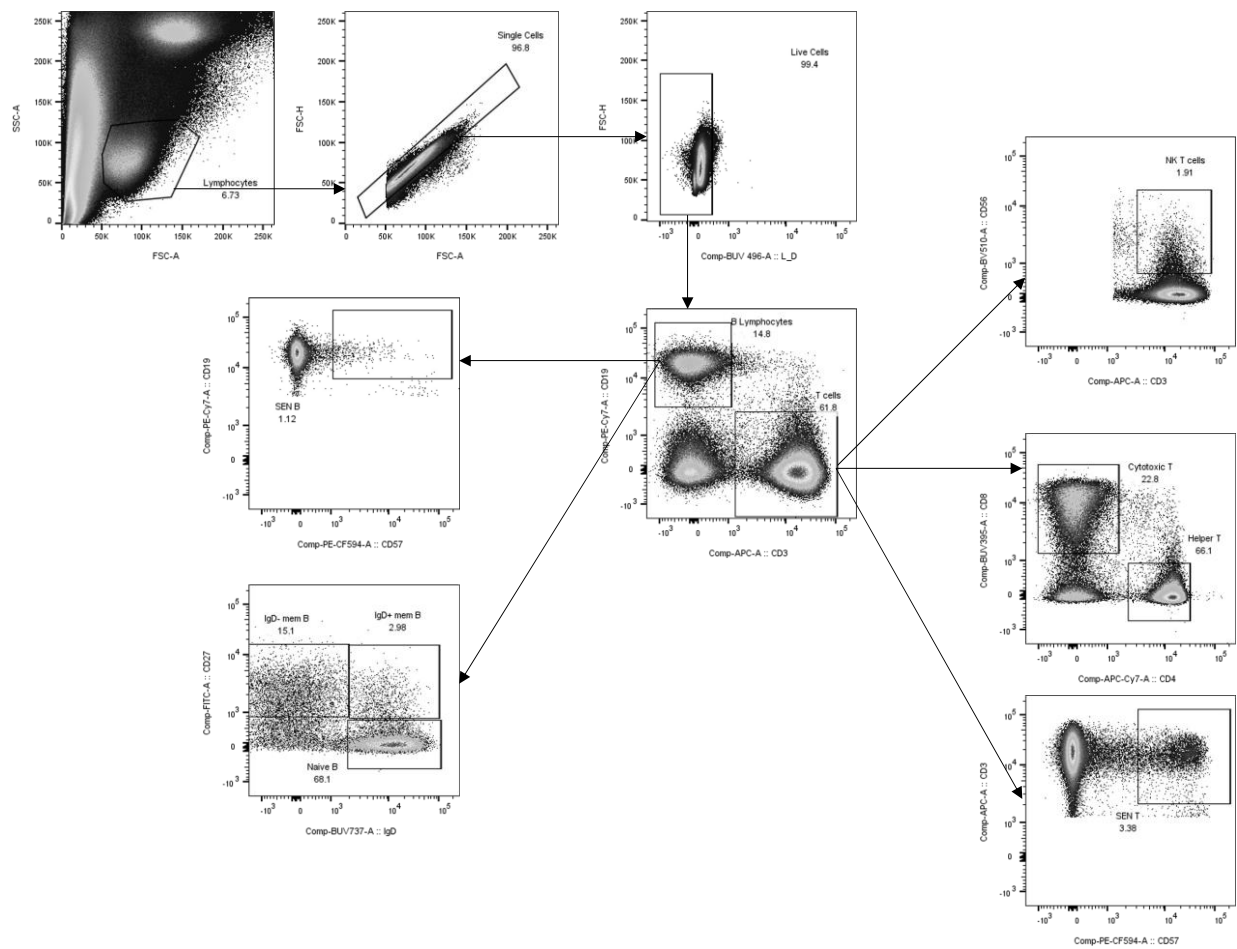

Supplemental Figure S1. Gating strategy for major populations.

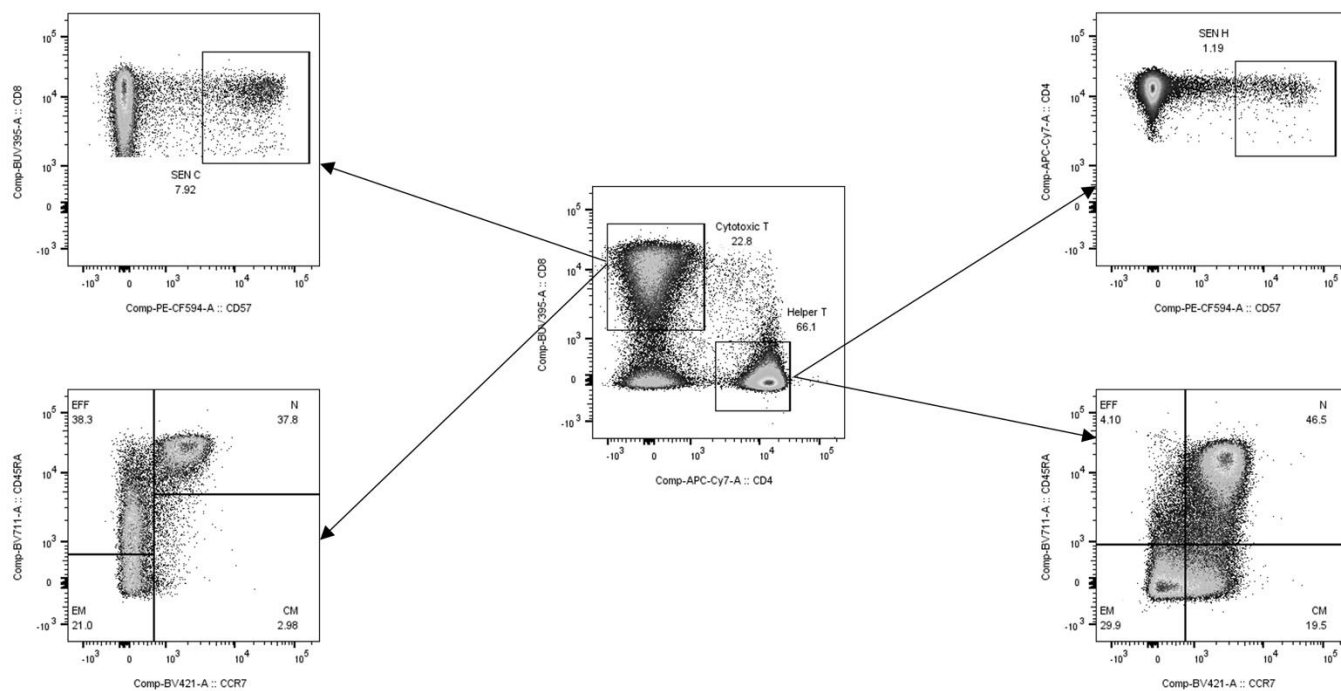

Supplemental Figure S2. Gating strategy for major populations.
